# Supplementary material for: A portable label-free electrochemical DNA biosensor for rapid detection of Salmonella Typhi
Source: Royal Society of Chemistry journal article supplement (doi:10.1039/d4ay00888j), 2024-01-01
Supplement: d4ay00888j1.pdf [file d4ay00888j1.pdf]

## Supporting information

### Portable Label-Free Electrochemical DNA Biosensor for Rapid Detection of *Salmonella* Typhi

Nor Syafirah Zambry, <sup>a,b,c</sup> Mohd Syafiq Awang, <sup>d</sup> Hairul Hisham Hamzah, <sup>e,f</sup> Ahmad Najib Mohamad, <sup>c</sup> Muhammad Fazli Khalid, <sup>c</sup> Beh Khi Khim, <sup>d</sup> Yazmin Bustami, <sup>g</sup> Nurul Fauzani Jamaluddin, <sup>a,b</sup> Fatimah Ibrahim\* <sup>a,b</sup> Ismail Aziah, <sup>\*c</sup> and Asrulnizam Abd Manaf\* <sup>d</sup>

<sup>a</sup> Centre for Innovation in Medical Engineering (CIME), Faculty of Engineering, Universiti Malaya, 50603 Kuala Lumpur, Malaysia.

<sup>b</sup> Department of Biomedical Engineering, Faculty of Engineering, Universiti Malaya, 50603 Kuala Lumpur, Malaysia.

<sup>c</sup> Institute for Research in Molecular Medicine (INFORMM), Health Campus, Universiti Sains Malaysia, 16150 Kubang Kerian, Kelantan, Malaysia.

<sup>d</sup> Collaborative Microelectronic Design Excellence Center (CEDEC), Universiti Sains Malaysia, Sains@USM, Level 1, Block C, No. 10 Persiaran Bukit Jambul, 11900 Bayan Lepas, Pulau Pinang, Malaysia

<sup>e</sup> School of Health & Life Sciences, Teesside University, Middlesbrough, Tees Valley, TS1 3BX, United Kingdom.

<sup>f</sup> School of Chemical Sciences, Universiti Sains Malaysia, 11800 Minden, Pulau Pinang, Malaysia.

<sup>g</sup> School of Biological Sciences, Universiti Sains Malaysia, 11800 Minden, Pulau Pinang, Malaysia.

\*Corresponding authors e-mail address: [eeasrulnizam@usm.my](mailto:eeasrulnizam@usm.my); [aziahismail@usm.my](mailto:aziahismail@usm.my); [fatimah@um.edu.my](mailto:fatimah@um.edu.my)

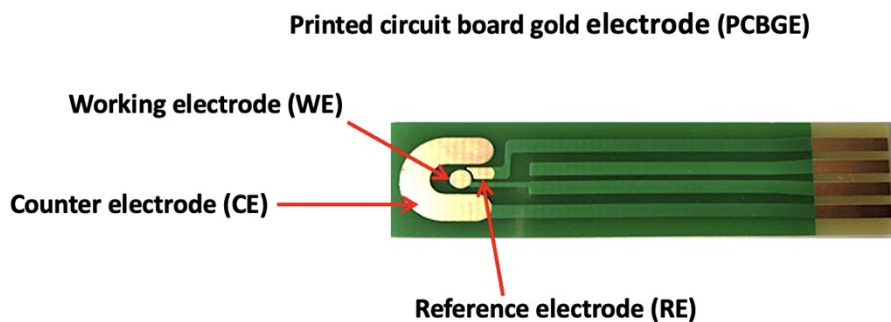

**Fig. S1.** The in-house design printed circuit board gold (Au) electrode (PCBGE) with a three-electrode system used in this study. The data supporting this article have been included as part of the Supplementary Information. (Data for this article are available at <https://doi.org/10.1039/d2lc01159j>).

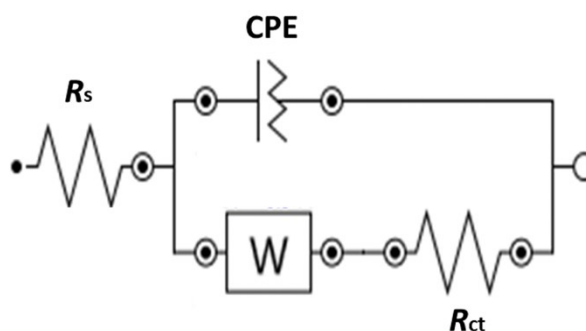

**Fig. S2.** Suggested an equivalent circuit model utilized in convergently fitting the Nyquist plots from EIS measurements.  $R_s$  is the solution resistance,  $W$  is the Warburg constant, CPE is the constant phase element, and  $R_{ct}$  is the charge transfer resistance. The data supporting this article have been included as part of the Supplementary Information. (Data for this article are available at <https://doi.org/10.1039/d2lc01159j>).

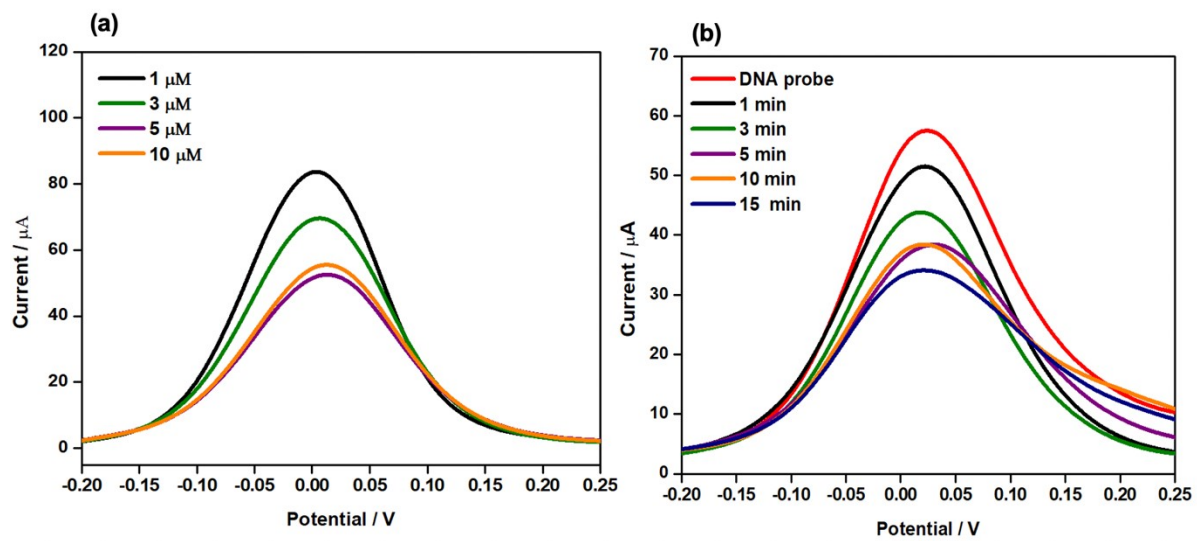

**Fig. S3.** DPV responses of developed biosensor using different (a) ssDNA probe concentrations, and (b) incubation time of target ssDNA.
